# Supplementary material for: Nanotube-shaped PtFe intermetallics: controlled synthesis, crystal structure, and improved electrocatalytic activities
Source: Royal Society of Chemistry journal article supplement (doi:10.1039/c8ce00601f), 2018-01-01
Supplement: c8ce00601f2.pdf [file c8ce00601f2.pdf]

## Supplementary Information

### **Nanotube-shaped PtFe intermetallics: Control synthesis, crystal structure and their improved electrocatalytic activities**

Xuebin Zhang,<sup>a</sup> Shujun Tian,<sup>a</sup> Wenjing Yu,<sup>a</sup> Bingqing Lu,<sup>a</sup> Tianyang Shen,<sup>b</sup>  
Lin Xu,<sup>a</sup> Dongmei Sun,<sup>\*a</sup> Shoulin Zhang<sup>\*a</sup> and Yawen Tang<sup>a</sup>

<sup>a</sup> Jiangsu Key Laboratory of New Power Batteries, Jiangsu Collaborative  
Innovation Centre of Biomedical Functional Materials, School of  
Chemistry and Materials Science, Nanjing Normal University, Nanjing  
210023, China.

<sup>b</sup> College of Material Science and Engineering, Beijing University of  
Chemical Technology, Beijing 100029, China.

Corresponding Authors: [sundongmei@njnu.edu.cn](mailto:sundongmei@njnu.edu.cn);

[zhangshoulin@njnu.edu.cn](mailto:zhangshoulin@njnu.edu.cn)

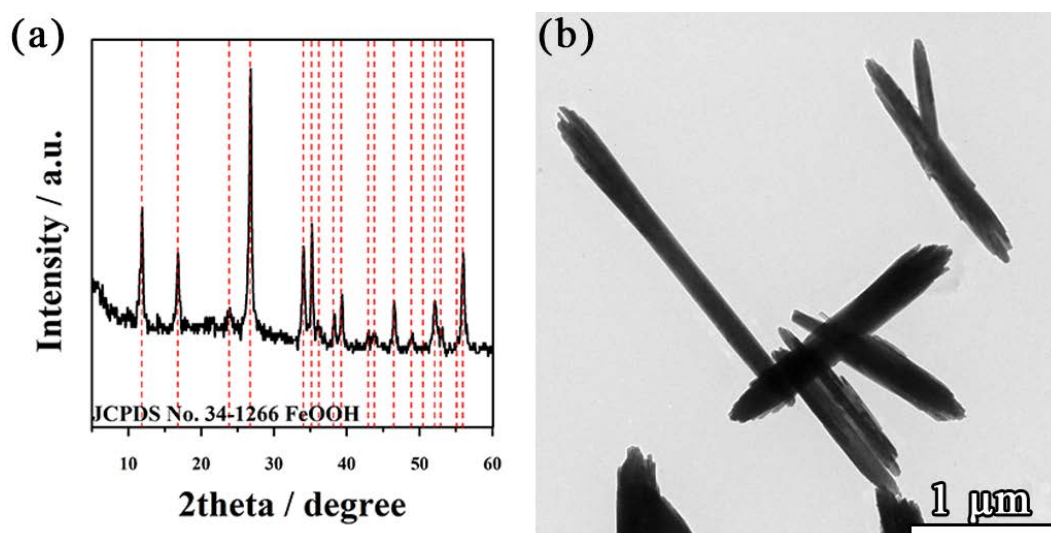

**Fig. S1** (a) XRD pattern and (b) TEM image of FeOOH nanorod.

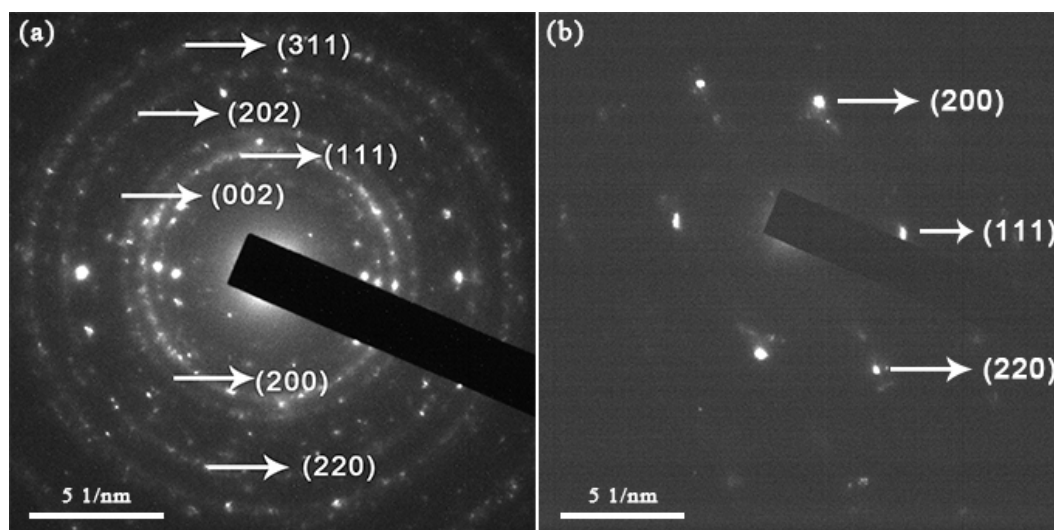

**Fig. S2** Selected area electron diffraction patterns of the PtFe intermetallic nanotube of (a) as a whole and (b) a single PtFe intermetallic nanoparticle sitting on the surface of the tube.

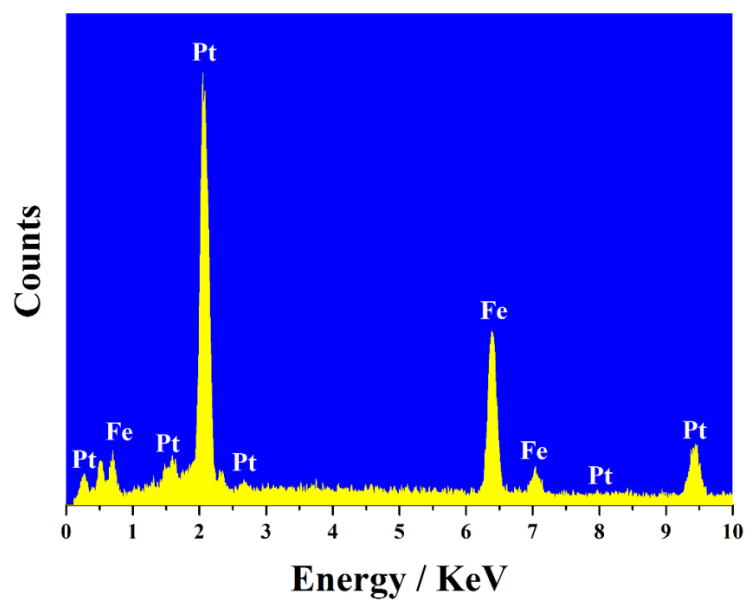

**Fig. S3** EDX spectrum of order PtFe intermetallic nanotube.

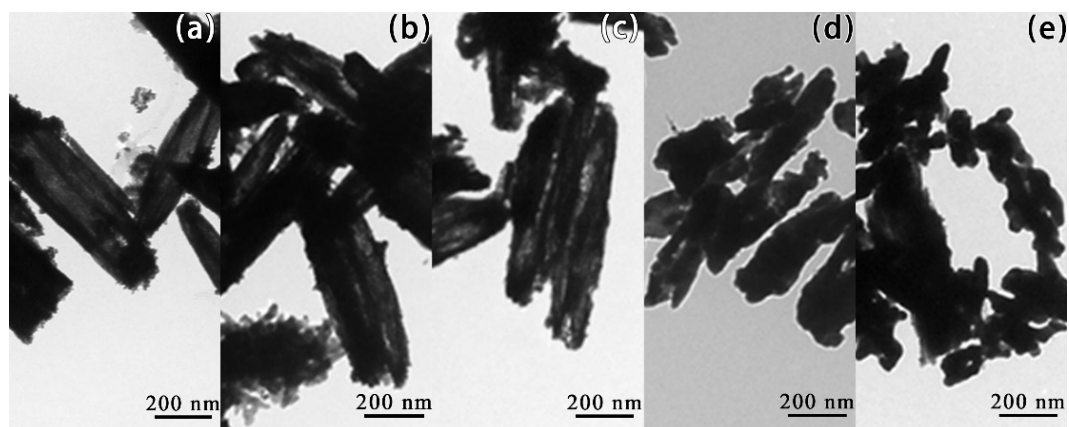

**Fig. S4** TEM images of (a) PtFe-300, (b) PtFe-400, (c) PtFe-500, (d) PtFe-600, (e) PtFe-700.

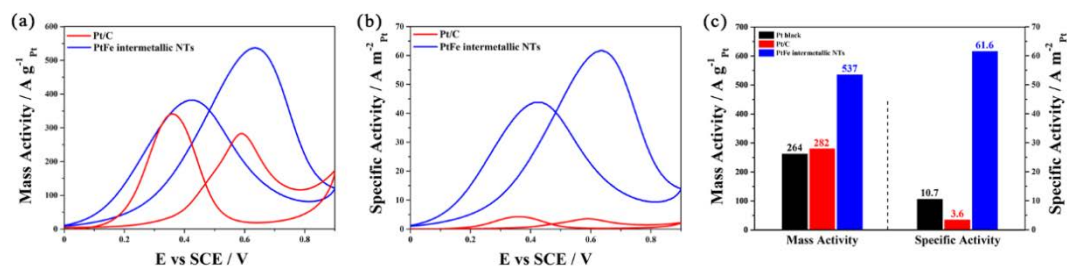

**Fig. S5** (a) Mass-normalized, (b) ECSA-normalized cyclic voltammograms of Pt/C (red line) and PtFe intermetallic NTs (blue line) in the N<sub>2</sub>-saturated 1 M CH<sub>3</sub>OH + 0.5 M H<sub>2</sub>SO<sub>4</sub> solution at a scan rate of 50 mV s<sup>-1</sup>, and (c) the comparison of the corresponding  $I_f$  of the related catalysts.

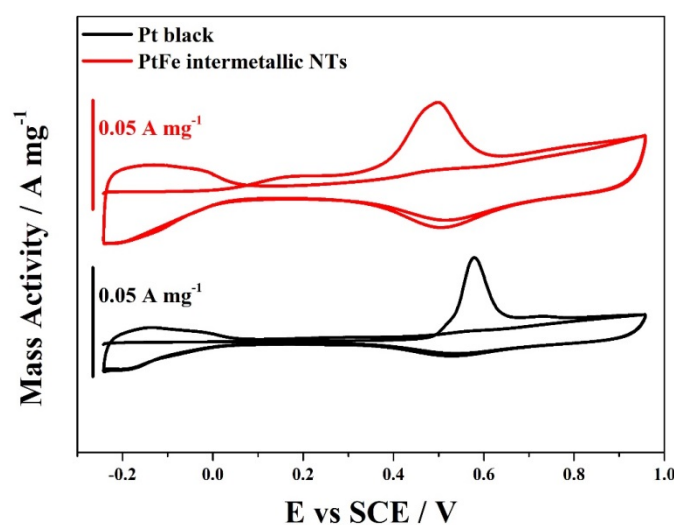

**Fig. S6** Cyclic voltammograms of pre-absorbed CO at PtFe intermetallic NTs (red line) and Pt black (black line) in 0.5 M H<sub>2</sub>SO<sub>4</sub> solution at the scan rate of 50 mV s<sup>-1</sup>.

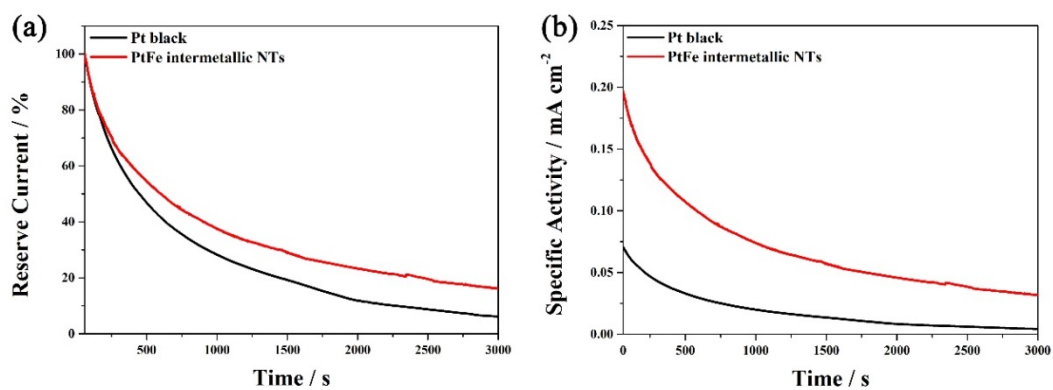

**Fig. S7** Chronoamperometry curves of PtFe intermetallic NTs and Pt black in 1 M CH<sub>3</sub>OH + 0.5 M H<sub>2</sub>SO<sub>4</sub> solution at 0.7 V.

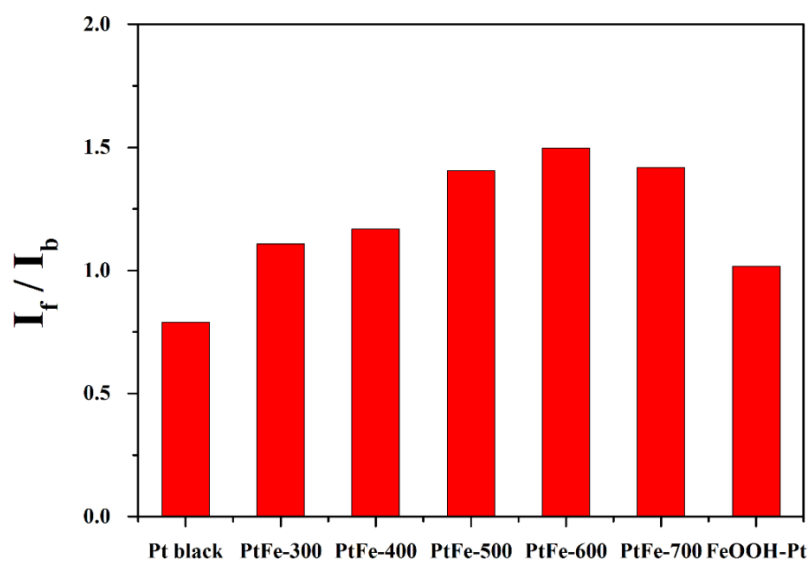

**Fig. S8**  $I_f/I_b$  of PtFe-300, PtFe-400, PtFe-500, PtFe-600, PtFe-700, FeOOH-Pt and Pt black.

**Table S1** Activity comparison of Pt-based intermetallic catalysts toward methanol oxidation reaction.

| No | Catalysts                                             | Mass Activity<br>(A g <sup>-1</sup> <sub>Pt</sub> ) | Specific Activity<br>(A m <sup>-2</sup> <sub>Pt</sub> ) | Electrolyte                                                              | Morphology                                                                            | Ref.                                                      |
|----|-------------------------------------------------------|-----------------------------------------------------|---------------------------------------------------------|--------------------------------------------------------------------------|---------------------------------------------------------------------------------------|-----------------------------------------------------------|
| 1  | PtFe intermetallic nanotube                           | 536                                                 | 61.64                                                   | 0.5 M H <sub>2</sub> SO <sub>4</sub> and 1 M CH <sub>3</sub> OH solution | 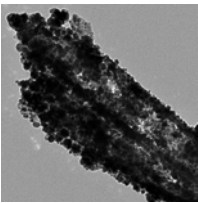   | Our work                                                  |
| 2  | Ga-Pt intermetallic nanoparticle embedded in graphene | 76                                                  | 14.80                                                   | 0.5 M KOH and 2M CH <sub>3</sub> OH solution                             |    | <i>Electrochim. Acta</i> , 2015, <b>190</b> , 659-667     |
| 3  | Pt <sub>3</sub> Ti/C inter-metallic nanoparticle      | 149                                                 | 0.31                                                    | 0.1 M HClO <sub>4</sub> and 1 M CH <sub>3</sub> OH solution              |   | <i>J. Am. Chem. Soc.</i> , 2014, <b>136</b> , 10206-10209 |
| 4  | Pt <sub>3</sub> V/C inter-metallic nanoparticle       | 200                                                 | 0.38                                                    | 0.1 M HClO <sub>4</sub> and 1 M CH <sub>3</sub> OH solution              |  | <i>J. Am. Chem. Soc.</i> , 2014, <b>136</b> , 10206-10209 |
| 5  | Pt <sub>3</sub> Ti intermetallic nanoparticles        | 56                                                  | 6.10                                                    | 0.5 M HClO <sub>4</sub> and 0.5 M CH <sub>3</sub> OH solution            |  | <i>J. Am. Chem. Soc.</i> , 2008, <b>130</b> , 5452-5458   |
| 6  | Cubic intermetallic PtCu <sub>3</sub> nanocages       | 50                                                  | 141.0                                                   | 0.1 M HClO <sub>4</sub> and 1 M CH <sub>3</sub> OH solution              |  | <i>J. Am. Chem. Soc.</i> , 2012, <b>134</b> , 13934-13937 |
| 7  | Intermetallic Pt <sub>3</sub> Zn nanocrystals         | 250                                                 | 9.50                                                    | 0.5 M methanol and 0.1 M CH <sub>3</sub> OH solution                     |  | <i>ACS Nano</i> , 2012, <b>6</b> , 5642-5647              |
